# Supplementary material for: Natural variation of YELLOW SEEDLING1 affects photosynthetic acclimation of Arabidopsis thaliana
Source: PubMed Central journal article supplement (PMC5680337; doi:10.1038/s41467-017-01576-3), 2017-11-10
Supplement: 41467_2017_1576_MOESM3_ESM.pdf [file 41467_2017_1576_MOESM3_ESM.pdf]

## **Descriptions of Additional Supplementary Files**

File Name: Supplementary Dataset 1

Descriptions: List of candidate genes co-localized with SNPs repetitively associated with  $\Phi$ PSII with an LD window of 100Kb

File Name: Supplementary Dataset 2

Descriptions: Shortlist of prioritized candidate genes potentially underlying quantitative trait loci (QTLs) for photosynthesis acclimation in Arabidopsis.

File Name: Supplementary Dataset 3

Descriptions: List of candidate genes co-localized with SNPs repetitively associated with  $\Phi$ PSII with an LD window of 20Kb

File Name: Supplementary Dataset 4

Descriptions: List of candidate genes co-localized with SNPs associated with curve parameters of  $\Phi$ PSII response

File Name: Supplementary Dataset 5

Descriptions: List of candidate genes co-localized with SNPs associated with first principal component of  $\Phi$ PSII response
